# Supplementary material
Source: ML conference proceedings conference paper supplement (https://proceedings.mlr.press/v37/liua15.html)
Supplement: Supplementary file [file liua15-supp.pdf]

# Non-Linear Cross-Domain Collaborative Filtering via Hyper-Structure Transfer: Supplementary Materials

**Yan-Fu Liu**

National Tsing Hua University, ROC

YFLIU@NETDB.CS.NTHU.EDU.TW

**Cheng-Yu Hsu**

National Tsing Hua University, ROC

CYHSU@NETDB.CS.NTHU.EDU.TW

**Shan-Hung Wu**

National Tsing Hua University, ROC

SHWU@CS.NTHU.EDU.TW

## 1. Objective Solving

With the following Eqs.

$$\tilde{\mathbf{B}}_{:, :, h}^{(k)} = \mathbf{A}^{(k)} \Phi_h^{(k)} \mathbf{E}^{(k)\top} \quad (1)$$

and

$$\text{proj}^{(k)}(\mathbf{B}) = \mathbf{A}^{(k)} \Psi^{(k)} \mathbf{E}^{(k)\top} \quad (2)$$

explained in the main text, we can employ the multiplicative gradient descent method (Ding et al., 2006) to update the  $\tilde{\mathbf{U}}^{(k)} = [\mathbf{U}^{(k)}, \mathbf{0}]$ ,  $\tilde{\mathbf{V}}^{(k)} = [\mathbf{V}^{(k)}, \mathbf{0}]$ ,  $\mathbf{A}^{(k)}$ , and  $\mathbf{E}^{(k)}$  in each iteration. The update rules for Eq. (5) of the main text are given below:

$$\tilde{\mathbf{U}}^{(k)} \leftarrow \tilde{\mathbf{U}}^{(k)} \circ \sqrt{\frac{\mathbf{X}^{(k)} \tilde{\mathbf{V}}^{(k)} \mathbf{F}^{(k)\top}}{\tilde{\mathbf{U}}^{(k)} \mathbf{F}^{(k)} \tilde{\mathbf{V}}^{(k)\top} \tilde{\mathbf{V}}^{(k)} \mathbf{F}^{(k)\top}}}, \quad (3)$$

$$\tilde{\mathbf{V}}^{(k)} \leftarrow \tilde{\mathbf{V}}^{(k)} \circ \sqrt{\frac{\mathbf{X}^{(k)} \tilde{\mathbf{U}}^{(k)} \mathbf{F}^{(k)}}{\tilde{\mathbf{V}}^{(k)} \mathbf{F}^{(k)\top} \tilde{\mathbf{U}}^{(k)\top} \tilde{\mathbf{U}}^{(k)} \mathbf{F}^{(k)}}}, \quad (4)$$

where  $\mathbf{F}^{(k)} = \mathbf{A}^{(k)} \Psi^{(k)} \mathbf{E}^{(k)\top} = \text{proj}^{(k)}(\mathbf{B})$ .

$$\mathbf{A}^{(k)} \leftarrow \mathbf{A}^{(k)} \circ \sqrt{\frac{[\tilde{\mathbf{U}}^{(k)\top} \mathbf{X}^{(k)} \tilde{\mathbf{V}}^{(k)} \mathbf{E}^{(k)} \Psi^{(k)}]}{[\tilde{\mathbf{U}}^{(k)\top} \tilde{\mathbf{U}}^{(k)} \mathbf{A}^{(k)} \Psi^{(k)} \mathbf{E}^{(k)\top} \tilde{\mathbf{V}}^{(k)\top} \tilde{\mathbf{V}}^{(k)} \mathbf{E}^{(k)} \Psi^{(k)}]}}, \quad (5)$$

$$\mathbf{E}^{(k)} \leftarrow \mathbf{E}^{(k)} \circ \sqrt{\frac{[\tilde{\mathbf{V}}^{(k)\top} \mathbf{X}^{(k)} \tilde{\mathbf{U}}^{(k)} \mathbf{A}^{(k)} \Psi^{(k)}]}{[\tilde{\mathbf{V}}^{(k)\top} \tilde{\mathbf{V}}^{(k)} \mathbf{E}^{(k)} \Psi^{(k)} \mathbf{A}^{(k)\top} \tilde{\mathbf{U}}^{(k)\top} \tilde{\mathbf{U}}^{(k)} \mathbf{A}^{(k)} \Psi^{(k)}]}}, \quad (6)$$

where  $\circ$  denotes the elemental-wise product,  $\frac{[\cdot]}{[\cdot]}$  denotes the elemental-wise division, and  $\sqrt{\cdot}$  denotes elemental-wise square root. The detailed steps are given in Algorithm 1. Note that we initiate the last columns of  $\tilde{\mathbf{U}}^{(k)}$  and  $\tilde{\mathbf{V}}^{(k)}$  by zero vectors, and because they are updated by element-wise multiplications, the last columns of  $\tilde{\mathbf{U}}^{(k)}$  and  $\tilde{\mathbf{V}}^{(k)}$  will remain zeros during each iteration.

## 2. More on Experiments

In this section, we give more details about our settings and conduct more experiments to further study the performance of MOTAR. Table 1 shows some statistics of our real datasets.

| Datasets           | DBLP      | MovieLens  |
|--------------------|-----------|------------|
| #users             | 180,640   | 69,878     |
| #items             | 141,507   | 10,677     |
| #rating events     | 1,495,081 | 10,000,054 |
| Avg. #ratings/user | 8.277     | 143.107    |
| Avg. #ratings/item | 10.565    | 936.598    |

Table 1: Statistics of the real datasets.

We validate that minimizing the MOTAR objective score does improve performance. Figure 1 shows the typical correlation between the objective score and MAE of MOTAR over real datasets. This justifies the validity of our MOTAR objective.

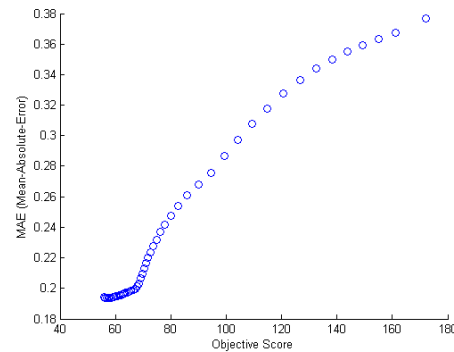

Figure 1: The correlation between the objective score and MAE of MOTAR.

**Algorithm 1** The MOTAR training process.

---

**Input:** Dataset  $\{\mathbf{X}^{(k)}\}_{1 \leq k \leq d}$  and hyperparameters  $\sigma, \beta, \{p^{(k)}, q^{(k)}\}_k$ , and  $z$   
**Output:**  $\{\mathbf{Y}^{(k)}\}_k$   
Initialize  $\{\tilde{\mathbf{U}}^{(k)}\}_k$  and  $\{\tilde{\mathbf{V}}^{(k)}\}_k$  by random positives but set their last columns to  $\mathbf{0}$   
Initialize  $\mathcal{B}$  by random positives  
**repeat**  
  **for**  $k \in \{1, \dots, d\}$  **do**  
    Obtain the cubicization  $\tilde{\mathcal{B}}^{(k)}$  from  $\mathcal{B}$ , CP-decompose it by Eq. (1), and remember  $\Phi_h^{(k)}$ 's  
    Calculate  $\text{proj}^{(k)}(\mathcal{B})$  by Eq. (2)  
    Update  $\tilde{\mathbf{U}}^{(k)}, \tilde{\mathbf{V}}^{(k)}, \mathbf{A}^{(k)}, \mathbf{E}^{(k)}$  by Eqs. (3)~(6)  
    Normalize each row of  $\tilde{\mathbf{U}}^{(k)}, \tilde{\mathbf{V}}^{(k)}$  by its  $l_1$  norm  
    Reconstruct  $\mathcal{B}$  by Eq.(1) using the remembered  $\Phi_h^{(k)}$ 's  
  **end for**  
**until** convergence

---

## References

Ding, Chris, Li, Tao, Peng, Wei, and Park, Haesun. Orthogonal nonnegative matrix t-factorizations for clustering. In *Proc. of KDD*, 2006.
